# Supplementary material for: The cellular chloride channels CLIC1 and CLIC4 contribute to virus-mediated cell motility
Source: PubMed Central journal article supplement (PMC5868249; doi:10.1074/jbc.ra117.001343), 2018-02-08
Supplement: supp_RA117.001343_134501_0_supp_36006_p0phfm.pdf [file supp_RA117.001343_134501_0_supp_36006_p0phfm.pdf]

## **The cellular chloride channels CLIC1 and CLIC4 contribute to virus-mediated cell motility**

Gabrielė Stakaitytė<sup>1,2#</sup>, Nnenna Nwogu<sup>1,2#</sup>, Jonathan D. Lippiat<sup>3</sup>, G. Eric Blair<sup>1</sup>, Krzysztof Poterlowicz<sup>4</sup>, James R. Boyne<sup>4</sup>, Andrew Macdonald<sup>1,2</sup>, Jamel Mankouri<sup>1,2</sup>, and Adrian Whitehouse<sup>1,2</sup>

*<sup>1</sup>School of Molecular and Cellular Biology, <sup>2</sup>Astbury Centre for Structural Molecular Biology, <sup>3</sup>School of Biomedical Sciences, Faculty of Biological Sciences, University of Leeds, Leeds, LS2 9JT, <sup>4</sup>Centre for Skin Sciences, School of Chemistry and Biosciences, Faculty of Life Sciences, University of Bradford, Bradford, BD7 1DP, United Kingdom*

### **Supplementary Information**

Contents:  
Supplemental Figures (Figures 1-2)

A(i)

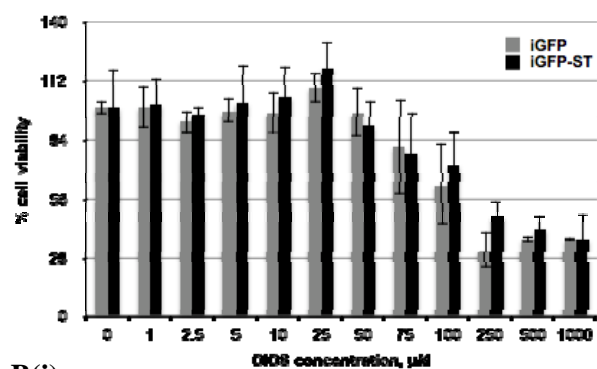

(ii)

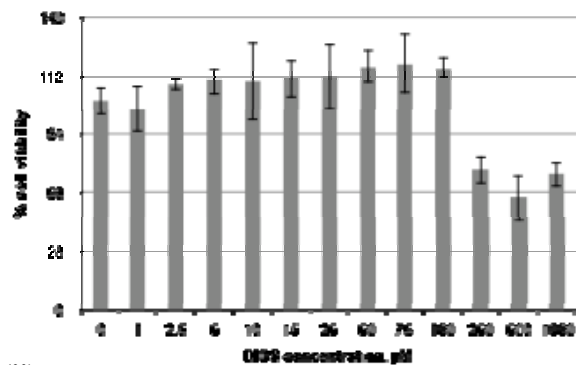

B(i)

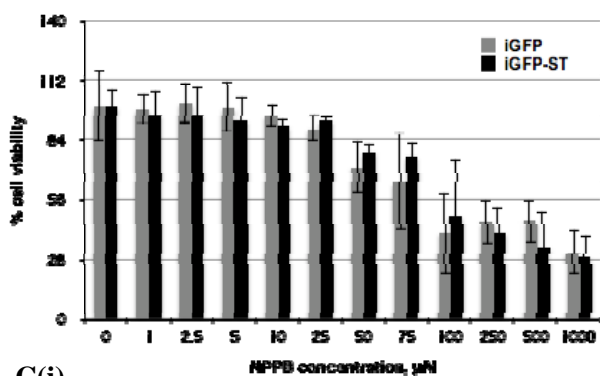

(ii)

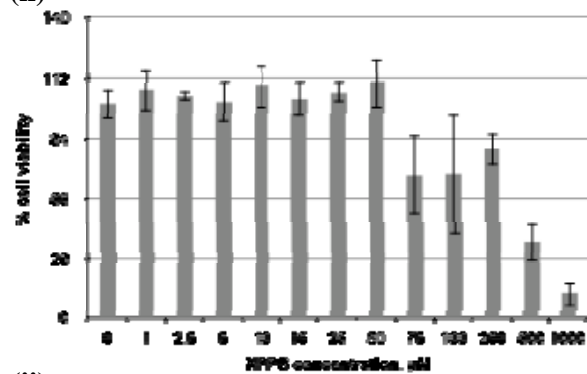

C(i)

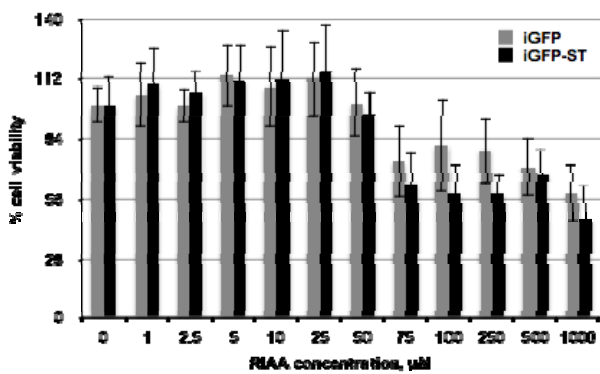

(ii)

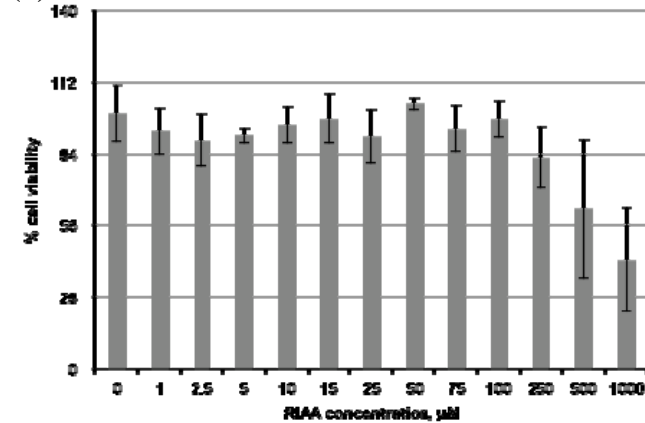

**Supplementary Figure 1. Selection of non-toxic concentrations of each Cl<sup>-</sup> channel modulator.** Cell viability was measured in (A) i293-EGFP and i293-EGFP-ST and (B) MCC13 cells using an MTS-based assay in the presence of increasing concentrations of (i) DIDS, (ii) NPPB and (iii) RIAA inhibitors.

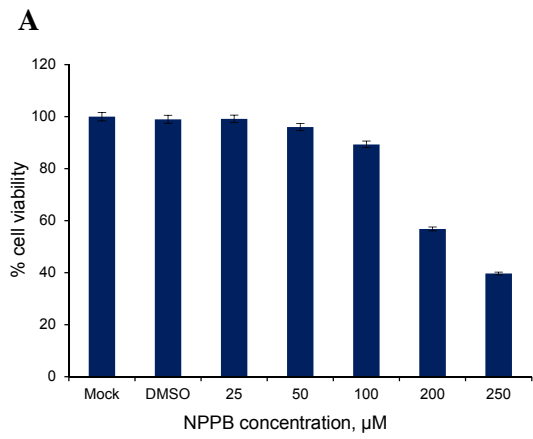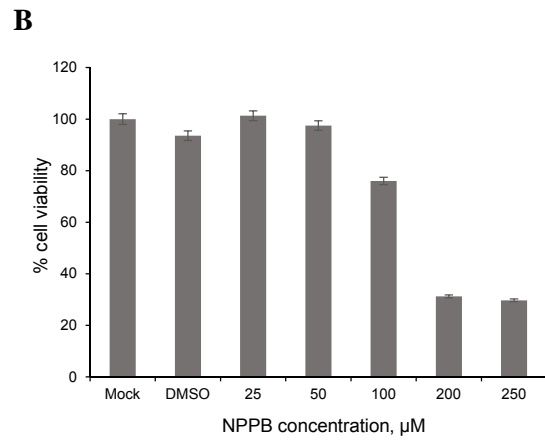

**Supplementary Figure 2. Selection of non-toxic concentrations of NPPB channel modulator in MCPyV positive Merkel cell carcinoma cell lines.** Cell viability was measured in **(A)** PeTa and **(B)** Waga cells using an MTS-based assay in the presence of increasing concentrations of NPPB inhibitor.
